# Supplementary material for: A cmap-enabled gene expression signature-matching approach identifies small-molecule inducers of accelerated cell senescence
Source: BMC Genomics. 2019 Apr 15;20:290. doi: 10.1186/s12864-019-5653-x (PMC6466706; doi:10.1186/s12864-019-5653-x)
Supplement: Supplementary file 2 — The differentially expressed genes shared between IR- and p21-induced senescence. (XLSX 38 kb) [file 12864_2019_5653_MOESM2_ESM.xlsx]

## Sheet: rank
Gene Name	IR Ratio	p21 Ratio
CXCL12	0.215734	0.292477
DEPDC1	0.244837	0.462369
PBK	0.299797	0.359202
MXD3	0.304082	0.290115
ACACB	0.328358	0.1795
MND1	0.33029	0.518945
TIFA	0.331905	0.319568
CKAP2L	0.339201	0.447236
ESPL1	0.34352	0.306265
CENPK	0.343914	0.434093
HMMR	0.348529	0.511056
SPC24	0.348831	0.467734
SYCE2	0.36182	0.281123
EME1	0.361929	0.492859
C21orf58	0.364432	0.474355
ORC1L	0.368215	0.428163
IFI27L1	0.37018	0.558596
FOXM1	0.371692	0.337673
DTL	0.373603	0.407415
CCDC85A	0.374147	0.489314
FANCA	0.374999	0.399164
CDC25C	0.37521	0.34431
ALDH6A1	0.375216	0.603947
LOC100128191	0.378356	0.383369
KIF11	0.383107	0.555032
SPC25	0.383673	0.349452
DLGAP5	0.383773	0.530813
KIF2C	0.387737	0.407209
RAD51AP1	0.391978	0.535064
TROAP	0.397849	0.377768
ITGB3BP	0.400161	0.596905
WDR79	0.401901	0.559827
ABHD7	0.40262	0.579307
SLITRK4	0.403872	0.408816
MKI67	0.40398	0.451915
NDC80	0.404075	0.481506
PLK1	0.404607	0.520375
GK	0.405118	0.37983
PTTG3P	0.407076	0.336767
C6orf173	0.408733	0.488331
C19orf51	0.410821	0.475327
EXO1	0.413411	0.420352
HEY2	0.414351	0.422789
NEK2	0.414685	0.548192
AURKB	0.41492	0.342097
PHGDH	0.415515	0.515645
MCM2	0.415817	0.493835
SGOL1	0.418129	0.320901
LOC399942	0.419333	0.485895
PABPC4L	0.421493	0.492804
ZNF519	0.423174	0.450824
CDCA3	0.423364	0.360231
PKMYT1	0.423529	0.391657
DUT	0.424531	0.579472
NUDT1	0.425171	0.530909
C15orf42	0.429401	0.442362
TMEM118	0.430868	0.531362
PSRC1	0.430969	0.379912
CCDC5	0.430971	0.613812
APOBEC3B	0.43119	0.350282
CDCA7	0.434311	0.614903
NRM	0.435947	0.3588
PIF1	0.436406	0.447386
BUB1	0.436879	0.500208
GSG2	0.436983	0.252129
LMNB1	0.440802	0.416966
BIRC5	0.442639	0.380949
PRIM1	0.443319	0.500598
FAM5C	0.445123	0.296689
AGR3	0.446163	0.492082
CNIH2	0.446611	0.626758
NUSAP1	0.447471	0.486819
ACBD7	0.44818	0.523781
NMU	0.448846	0.277802
CHAF1A	0.450388	0.45039
TAF5	0.454673	0.571407
ZWINT	0.454676	0.435882
TCF19	0.45603	0.366888
TACC3	0.4574	0.425105
STMN1	0.457508	0.454592
KIF24	0.457549	0.390127
EPR1	0.457697	0.552465
TK1	0.459577	0.434474
PTTG1	0.460472	0.385092
HIST1H2BJ	0.460694	0.365912
GTSE1	0.460714	0.399769
C13orf3	0.462909	0.417187
CENPH	0.463519	0.43083
TNFAIP8L1	0.464347	0.383772
RAD54L	0.464993	0.45964
GFRA1	0.465289	0.540447
LOC441484	0.466152	0.578626
ERCC6L	0.466261	0.452039
FBXO17	0.466528	0.522753
NEIL3	0.466696	0.32181
RACGAP1	0.467432	0.426767
CDCA8	0.468584	0.398427
HELLS	0.47056	0.618958
NCAPG	0.472816	0.515774
CDT1	0.473229	0.52879
C15orf23	0.474184	0.440749
FANCD2	0.47474	0.581867
CAB39L	0.475145	0.529116
SKP2	0.475591	0.493733
LOC81691	0.476004	0.446182
ZNF695	0.476565	0.457055
FANCI	0.476759	0.642823
TMPO	0.476822	0.45799
NOL12	0.478432	0.593666
RAD54B	0.480506	0.649603
CEP55	0.481061	0.44037
ASF1B	0.481413	0.547895
CDC2	0.482063	0.423143
E2F2	0.482406	0.539832
SNX26	0.482568	0.429811
MBOAT1	0.482901	0.590738
C17orf53	0.483505	0.519732
CHEK1	0.486712	0.416126
WDR51A	0.487171	0.498456
DSN1	0.487603	0.52139
CENPI	0.488788	0.462944
DEPDC1B	0.489731	0.404242
LOC643918	0.490777	0.569462
KIFC1	0.490937	0.405961
CDK5RAP2	0.492096	0.634663
GAS2L3	0.492615	0.539469
OIP5	0.493565	0.469611
POLE	0.493677	0.563286
KIF4A	0.493894	0.316158
C11orf82	0.494406	0.570961
CDCA2	0.496821	0.375531
FANCG	0.496862	0.651816
HIST1H3G	0.497217	0.323307
TOP2A	0.497597	0.511713
YBX2	0.497651	0.434682
DSCR6	0.497794	0.636836
NUDT6	0.498602	0.515947
COCH	0.499205	0.62541
LOC100134468	0.499269	0.532004
POLD1	0.500282	0.539661
CENPA	0.500306	0.394009
CHPT1	0.500592	0.392558
ANG	0.501353	0.367323
CDCA5	0.502357	0.532108
SERINC2	0.503064	0.445784
CHTF18	0.504781	0.661025
C1orf112	0.505967	0.527785
C10orf78	0.506521	0.508609
LOC92755	0.508824	0.623663
NUP62CL	0.509343	0.496133
DLEU1	0.510835	0.613782
MIR586	0.510852	0.58278
MIR1228	0.511106	0.630277
FANCC	0.511589	0.437959
HMGB2	0.512004	0.471318
PCP4	0.512975	0.371896
GMNN	0.513389	0.529089
C13orf27	0.514032	0.47193
RFC2	0.514452	0.508275
CDC25A	0.514933	0.454973
CBX1	0.518638	0.409262
RFC3	0.520059	0.586205
CDC45L	0.520816	0.500525
CCNA2	0.522156	0.410452
PKIB	0.522267	0.561383
DSCC1	0.522304	0.560974
CENPM	0.52231	0.334363
LOC100133012	0.522801	0.513864
METTL4	0.522811	0.534915
FAM64A	0.523376	0.384515
CCNB2	0.523503	0.535833
TRIP13	0.524562	0.568606
C9orf100	0.524608	0.44348
PRR11	0.524862	0.405499
C5orf34	0.525633	0.446259
RMI1	0.526645	0.626048
ZNF274	0.528552	0.479198
DHTKD1	0.528753	0.543835
HIST2H3C	0.529918	0.539815
CCNB1	0.53111	0.600316
KIF20A	0.531166	0.38872
LOC643995	0.531436	0.471607
WWOX	0.531529	0.5051
BUB1B	0.531809	0.592502
MCM10	0.53306	0.464474
CDKN3	0.533572	0.436748
CLSTN2	0.536136	0.465921
TPX2	0.53614	0.446576
SUV39H1	0.536372	0.50645
MYO19	0.536832	0.533334
TMEM107	0.537289	0.553723
RBM24	0.538135	0.585031
MTHFD1	0.53842	0.652868
NARG2	0.539377	0.62597
ARMCX6	0.539459	0.606117
HMGB1L1	0.539804	0.658121
LOC645726	0.540307	0.363105
POLE2	0.540775	0.473437
INCENP	0.541088	0.478795
TMEM149	0.541209	0.409324
LOC729816	0.541335	0.621375
GPSM2	0.541605	0.454549
PRIM2A	0.541862	0.545546
PHF19	0.542626	0.484973
LOC150051	0.542953	0.419473
GCHFR	0.543011	0.457523
C16orf75	0.544009	0.560029
C13orf34	0.545165	0.496176
NEURL1B	0.545445	0.452657
MELK	0.545609	0.46813
HJURP	0.548774	0.444608
PTGER2	0.551738	0.59226
UBE2T	0.552306	0.526186
TUBB	0.552858	0.650171
ATAD2	0.553549	0.538122
HOXC6	0.553772	0.449314
LOC653874	0.554377	0.522266
MAD2L1	0.554952	0.616065
CKAP2	0.556178	0.591646
CLCC1	0.556503	0.529958
CHAF1B	0.556911	0.651789
THOC6	0.557097	0.509314
C5orf39	0.557303	0.546548
MCM5	0.557514	0.544191
IL1RAP	0.557838	0.646233
NBPF15	0.560221	0.611918
PRC1	0.560339	0.523237
HNRPM	0.561038	0.505186
RNASEH2A	0.561169	0.491937
CEP78	0.562653	0.594434
C6orf167	0.564273	0.558271
LOC653820	0.564567	0.363614
POLA2	0.565969	0.556487
ADCY1	0.566059	0.46199
GGH	0.566097	0.610978
SLC16A14	0.566779	0.57208
RMND1	0.567037	0.59201
SLC39A8	0.5671	0.47033
TIPIN	0.56765	0.603661
CCDC74A	0.569389	0.393831
KIF23	0.570012	0.523612
IRX3	0.570074	0.455389
LOC648822	0.570739	0.578464
IL17RB	0.571854	0.567162
HAUS8	0.571958	0.49181
LOC653604	0.572206	0.391129
PSMC3IP	0.572264	0.423035
VKORC1	0.572918	0.598687
STIL	0.5732	0.575183
SLC16A10	0.574116	0.607154
LOC440145	0.574324	0.554021
FANCE	0.574419	0.513347
LOC729964	0.574479	0.448124
DHRS13	0.575304	0.552868
PCDH10	0.575885	0.389257
TIMELESS	0.575984	0.545138
SIP1	0.576214	0.629907
CA2	0.576859	0.138744
KIAA0101	0.578001	0.55508
SNRNP25	0.578401	0.503559
E2F7	0.579046	0.370656
MDC1	0.579334	0.600905
RFC4	0.580301	0.582956
GPER	0.580599	0.587997
CDC20	0.580845	0.537312
FAM83D	0.581457	0.398308
NCAPG2	0.582979	0.569835
H1FX	0.584017	0.528851
CENPO	0.584212	0.416478
PACSIN3	0.584698	0.435691
MASTL	0.585103	0.541479
DNMT3B	0.585501	0.473523
RRM2	0.587997	0.381735
PECR	0.588129	0.601327
GLA	0.588973	0.532487
THSD1P	0.589817	0.48544
PLEKHF1	0.591081	0.501493
LOC645251	0.591101	0.511039
LOC652657	0.591376	0.565797
SGK1	0.591392	0.367535
ARHGAP19	0.591442	0.596153
LOC143543	0.593498	0.665519
SKA2	0.593791	0.632267
MCM7	0.594418	0.539994
SAP30	0.595399	0.663446
CCDC34	0.59547	0.608441
LOC647784	0.595698	0.644372
LOC729505	0.596959	0.624782
PARP2	0.597048	0.620869
HOXC4	0.598272	0.216903
RAD51	0.600687	0.57797
MCM3	0.600933	0.61679
BARD1	0.601513	0.580228
LOC644877	0.601682	0.628222
C6orf129	0.6018	0.503381
LOC100133916	0.602572	0.662848
UCHL5IP	0.603704	0.653774
C11orf67	0.604459	0.62312
RAB30	0.60452	0.581246
CKS1B	0.604542	0.444915
LOC653354	0.605109	0.478515
RFC5	0.60635	0.604916
DDX11	0.606393	0.623054
FEN1	0.607175	0.576583
PMF1	0.608456	0.603182
MLLT11	0.608709	0.533339
ESR1	0.609009	0.655948
FBLN1	0.60936	0.574782
UBE2C	0.60956	0.402164
HIRIP3	0.609773	0.598727
MTP18	0.610014	0.63988
NBPF10	0.610168	0.613166
PPP2R5D	0.610734	0.632803
DACH1	0.61114	0.621108
C1orf41	0.611621	0.574619
ELOVL2	0.612049	0.582911
FAM54A	0.61219	0.371035
B3GALT3	0.612332	0.46544
APITD1	0.612488	0.556235
PSPH	0.612581	0.618938
ORC6L	0.612969	0.440262
LBR	0.613298	0.399481
TTF2	0.613596	0.644978
HRASLS2	0.616137	0.449035
LOC730183	0.616974	0.630207
C12orf65	0.61737	0.54509
LOC100130557	0.617547	0.472039
CBX5	0.617714	0.465126
CCDC21	0.617965	0.604474
ACYP1	0.618548	0.652051
NCAPD3	0.618691	0.473142
C5orf13	0.618725	0.473667
ELOVL6	0.619572	0.596222
NAT1	0.620918	0.631647
EYA3	0.621557	0.457631
NMB	0.622281	0.589154
LIG1	0.623267	0.582208
IMPA2	0.623921	0.485564
PGR	0.624857	0.4873
CENPN	0.626186	0.515682
HSPC157	0.626383	0.644057
CHEK2	0.626698	0.494622
PPIL5	0.628365	0.574467
PRPF38A	0.628458	0.600497
CSRP2	0.628933	0.433789
C14orf80	0.629667	0.647767
LOC100134304	0.630109	0.54795
TRERF1	0.6303	0.553086
MGC39900	0.630754	0.492566
PCNA	0.631852	0.613058
LOC728037	0.632063	0.618094
HIST2H4B	0.632745	0.642208
AURKA	0.633334	0.501873
CDCA7L	0.634677	0.572703
NHLRC2	0.635628	0.579184
HIST2H4A	0.636506	0.583985
C21orf2	0.637271	0.634481
UST	0.637412	0.646342
KIF22	0.638039	0.614658
ID2	0.638122	0.574737
CHN1	0.639454	0.556943
RTTN	0.641099	0.581307
C16orf59	0.641315	0.497565
B3GALNT1	0.641515	0.548744
LOC100132032	0.64252	0.66608
LOC100128086	0.643409	0.624099
SNRNP35	0.643472	0.548303
DLG3	0.64479	0.52175
PCK2	0.645036	0.553416
OGG1	0.64556	0.533675
CHRNA5	0.645615	0.653898
UHRF1	0.646005	0.508719
NCAPD2	0.646254	0.579126
LOC644330	0.648814	0.641477
ST7	0.649644	0.590949
LOC100133489	0.650551	0.575249
GPN3	0.651726	0.57992
ISOC1	0.654062	0.598295
CDCA4	0.654101	0.598357
INTS4	0.655456	0.631229
RAB3IP	0.65556	0.661489
PIGK	0.657865	0.632625
PXMP2	0.657968	0.618051
CCNF	0.658085	0.596155
DNAJC9	0.658442	0.653929
HOXC9	0.658485	0.401808
FBXO5	0.659914	0.515415
NBPF1	0.660072	0.444587
LOC100130561	0.663555	0.626219
FANCL	0.663566	0.627615
L2HGDH	0.665873	0.649706
SPATA7	1.50144	2.19193
WIPI2	1.50285	1.71807
IER5L	1.5043	1.97924
LOC654191	1.50714	1.89587
KIFAP3	1.50989	1.77779
SERF2	1.51014	1.5073
CALML5	1.51098	2.80977
KLHL35	1.5118	1.70167
SLC9A7	1.5131	1.74163
JMY	1.51548	1.60462
FJX1	1.51696	2.76759
TACSTD2	1.51769	1.56151
GCNT1	1.51933	2.53522
SDC1	1.52004	1.72445
WDR26	1.52658	1.81374
AGRN	1.52884	1.90688
SLC45A4	1.52899	1.51603
GALC	1.53096	2.10576
PLEC1	1.53186	1.79693
WSB1	1.53199	1.82389
TMEM8	1.53582	1.62368
C6orf165	1.5363	1.82896
CTNND2	1.53729	2.12325
STOX2	1.53735	2.12086
PAM	1.54053	1.51415
S100A11	1.54085	1.73908
GIPC1	1.54289	1.53399
OSBPL1A	1.54413	1.58193
ANKRD9	1.54565	1.62722
B4GALT1	1.54774	1.58841
PRNP	1.54876	1.83515
PDLIM1	1.54983	1.6728
PTRH1	1.55094	1.52793
NEBL	1.55466	1.95853
NAV2	1.55644	4.04671
SLC37A3	1.55745	1.63696
FAM38A	1.56026	1.67597
TFF3	1.56046	2.31839
TNKS1BP1	1.56572	1.54852
LOC100134424	1.5666	1.94837
SRC	1.56878	1.5624
MEX3B	1.57447	1.94585
BRI3P1	1.57521	1.62275
S100A13	1.57809	1.84259
ZDHHC1	1.57958	1.52785
E2F5	1.58196	1.81924
MEF2D	1.58422	1.8926
LOC100132395	1.59243	2.61843
RHBDF2	1.59266	1.6289
PCSK1N	1.59269	1.66318
CMYA5	1.59293	2.39284
AMOT	1.59345	1.53962
GPSM1	1.59657	1.68446
CLEC16A	1.59825	1.61923
MGC16121	1.59876	1.74639
CTSB	1.60194	1.52694
LOC730278	1.60459	1.57195
ZYX	1.60659	1.93965
PKP1	1.60777	2.20907
DOK7	1.61043	2.34826
CLCN7	1.61359	1.94079
NPNT	1.61481	1.6037
TP53AP1	1.61497	1.53736
KLHL24	1.61767	3.64079
JUP	1.61797	1.66475
NUAK1	1.63332	1.70962
REPS2	1.63395	1.71797
MAP4K4	1.64222	1.83226
ZNF217	1.64737	1.68633
PLAC2	1.64781	2.7557
CTXN1	1.64795	1.72064
PLEKHA6	1.65467	2.88545
GATS	1.66022	1.71552
LYPD3	1.66075	1.63751
ABTB1	1.66123	1.80512
CENTG3	1.66287	1.51089
PHACTR2	1.67188	1.95834
PTPRK	1.67302	1.73968
PRAGMIN	1.67411	1.94142
LGALS3BP	1.67515	2.26517
NMNAT2	1.67528	1.97955
ULBP2	1.67965	1.50233
KIF5C	1.68198	2.67554
DKFZp761P0423	1.68202	1.87718
RBPMS2	1.68237	1.63746
FBN2	1.68445	7.45957
DMKN	1.68463	1.53302
CD59	1.68658	2.73509
SMAD3	1.68768	3.61357
ABAT	1.68946	2.35511
DDIT4	1.69291	4.03676
EYA2	1.69528	3.37809
ADAP2	1.69581	2.38174
RDX	1.69822	2.80359
KDELR3	1.69849	1.71925
TMEM79	1.69923	1.80306
MYH9	1.70072	1.54612
LOC100130000	1.70321	2.44943
KHNYN	1.70324	1.55399
BOK	1.70498	2.04209
GAD1	1.70617	1.93587
BMP7	1.70654	2.58481
BID	1.70749	1.64948
ITGA3	1.70751	1.90345
ZDHHC7	1.71003	1.7447
TIMP1	1.71973	2.54716
TRIB1	1.72087	1.68144
RAB11FIP5	1.72098	1.53291
TGIF1	1.72339	1.73348
EPB41L5	1.72697	1.8776
KIAA1370	1.7322	1.88772
TNFAIP1	1.73315	1.73244
TACC1	1.73662	3.13948
ZFYVE26	1.74904	1.78215
CADM1	1.74934	1.77614
PLCD3	1.75012	2.05835
MYO1B	1.75182	2.34094
RBMS1	1.75299	1.68845
PFKFB3	1.75738	2.10212
MXD1	1.75757	1.74286
DBNDD1	1.75929	2.41537
CAV2	1.76064	2.22376
CSRP1	1.76181	1.541
PPL	1.76446	2.03788
SCUBE2	1.76853	1.83447
LOC100133080	1.76922	2.9557
MAP6D1	1.77165	1.75278
SDSL	1.77201	1.5204
NEK6	1.77425	1.52873
PTPN21	1.7771	1.583
IDS	1.77793	2.11475
CLIP3	1.78284	2.71608
TNFRSF12A	1.7847	1.82156
FNDC3B	1.78632	1.85476
KDM5B	1.78666	1.6782
TACC2	1.78938	1.59985
SASH1	1.79028	3.05362
ERRFI1	1.79488	1.71374
LOC283932	1.80063	1.83302
SEL1L3	1.80419	2.29616
CREB3L2	1.80953	1.55756
SELM	1.81171	1.79558
C14orf149	1.81648	1.6242
LOC100133583	1.824	2.15675
IDUA	1.82506	1.98944
MYH14	1.82713	2.04857
RAB11FIP1	1.83404	1.57418
CACNA1H	1.83603	2.39363
MYL5	1.83629	1.96603
PINK1	1.84099	1.67207
CLDN9	1.84159	2.55003
ESPN	1.84671	1.88703
DOCK1	1.84852	2.04498
QPCT	1.85422	1.53627
PRICKLE2	1.86537	1.57548
TIMP2	1.86596	1.57025
CARD9	1.86875	1.93648
LOC728323	1.86923	1.744
RNF144B	1.87074	2.0835
USMG5	1.88159	1.63219
MOBKL2C	1.88193	2.00362
TGFBR2	1.88571	1.67853
CYFIP2	1.88918	1.6295
CAV1	1.89423	3.25254
F2RL1	1.89968	1.70945
GPR56	1.9006	1.71467
GALNT10	1.90491	1.77258
TMEM150A	1.90907	1.75467
HIST1H4H	1.91175	1.62128
MAP3K9	1.91664	2.24065
PLXNB2	1.91674	1.68319
KLF4	1.91888	1.60516
LIMCH1	1.91902	3.53459
ARSG	1.92031	1.98891
LMO2	1.92458	2.73008
ABLIM2	1.92491	2.40319
GGCX	1.92739	1.51908
MGP	1.9311	2.24459
UCP2	1.93232	2.15647
ORAI3	1.93289	1.87003
LOC643031	1.93393	2.43069
RAB26	1.9343	1.51894
PNKD	1.93474	1.67949
ANXA3	1.93768	1.92439
IQSEC2	1.93983	2.07388
OPTN	1.94645	2.36753
ABCA11	1.96886	1.55066
NXNL2	1.97425	2.08645
LYPD1	1.98009	2.74988
SPHK1	1.98088	2.63637
YPEL3	1.98394	1.59437
ASB9	1.985	1.88843
FRAS1	1.98897	1.90684
PARP14	1.99075	2.15053
OPLAH	1.99399	1.79809
APOE	2.00632	1.96215
SYTL2	2.01208	2.57065
SGPP2	2.01811	2.63199
BIK	2.01868	1.77152
HOMER3	2.02008	1.92557
KLHL5	2.02519	1.58491
FSTL3	2.02842	2.4303
SLC25A18	2.02931	2.90113
DNAJC12	2.03391	1.56616
LMTK3	2.03525	2.84913
ABCC4	2.03589	1.864
CHPF2	2.03698	2.19329
HHEX	2.05474	2.03823
COL5A1	2.05636	2.92821
BRI3	2.05829	1.56845
MID1	2.06175	2.12773
LOC401052	2.06992	1.55654
ITGA5	2.07266	2.39444
ZNFX1	2.07873	1.73308
CASP4	2.0911	2.75284
SRPK2	2.09295	2.27427
IGF2BP2	2.09996	2.36964
MAPRE3	2.10201	1.81042
AOX1	2.10713	1.71862
MSMB	2.10972	2.43569
BHLHB2	2.11411	1.81433
KIF3C	2.11961	1.86007
LAD1	2.11986	1.86278
ACSL1	2.12013	2.15866
DCDC2	2.12543	3.66392
KIAA1539	2.13058	2.07365
SALL4	2.13176	2.39388
LOC647886	2.13386	1.67604
CAST	2.14405	1.7844
FBXL18	2.1516	1.83482
LHFPL2	2.16913	2.46195
PMEPA1	2.16979	3.38671
SPRY1	2.17835	2.47307
KCNF1	2.17894	2.78086
SP110	2.17985	2.05381
SRPX	2.18792	2.20791
FBXO32	2.1933	2.65312
UBC	2.19988	1.78461
SLC31A2	2.20211	2.6026
WIPI1	2.20958	1.88741
STOM	2.21171	1.56593
MPZL2	2.23931	1.96886
BIN1	2.24491	2.6408
TNS3	2.27126	2.52156
PYGL	2.27128	2.46255
ATP6V0A4	2.27245	1.85953
PCNXL2	2.28175	2.5543
SLC2A10	2.28425	1.77711
UBE2L6	2.2844	1.50661
KRT80	2.29752	3.17758
PNPLA7	2.29805	2.39026
STAT1	2.32418	1.86407
H2AFY	2.32432	1.99941
TMEM2	2.33233	2.13489
ANXA2	2.3375	2.22798
HLA-F	2.34917	2.37871
TGFBI	2.3569	1.71023
S100A4	2.36742	1.93033
RFTN1	2.36786	1.91952
OLFML3	2.36915	2.0575
EPS8L1	2.37737	2.1901
ADM	2.38189	1.9836
ANXA2P1	2.38512	2.65772
BMP1	2.38612	2.54266
ITGB4	2.38841	2.02352
SAT1	2.40084	1.74354
IL4R	2.45932	2.5851
LFNG	2.46429	3.27693
TPM2	2.47124	2.26197
CAMK2B	2.47617	3.08664
CYR61	2.48203	2.71231
ERP27	2.48906	2.51236
SCCPDH	2.49079	1.51404
ZMYND15	2.51801	3.49006
PIK3IP1	2.52507	3.76747
INHBB	2.52907	1.61561
ETV5	2.54471	4.66637
CCL5	2.5511	1.7405
S100A14	2.56349	3.2052
UPP1	2.57463	2.53536
LMCD1	2.59421	1.83378
GPRC5A	2.6072	3.90174
EPAS1	2.62435	1.53234
FOS	2.62762	6.46198
NRP1	2.62985	2.96608
EDN1	2.63949	3.55407
UNC5A	2.64122	4.31349
ENC1	2.64578	2.28012
CPEB2	2.64798	1.66927
KRT7	2.65576	3.94266
PRIC285	2.6744	1.67639
ISG20	2.68106	1.6509
EGR1	2.70555	6.67967
PPARG	2.70598	2.91189
CRIM1	2.71316	2.29506
FAM149A	2.72346	1.97133
LOC100134073	2.73496	3.62909
GALNTL4	2.74966	3.62415
SILV	2.75588	2.15728
C1QTNF6	2.75872	3.35683
STEAP3	2.76577	1.7656
KRT13	2.77006	2.89911
JUNB	2.7769	2.50947
SERPINA1	2.79091	1.56347
PCSK6	2.79094	3.38863
TUBB3	2.79255	2.81878
RND3	2.80539	2.97656
TPK1	2.82301	2.0667
HCST	2.87058	2.2919
DUSP5	2.88203	1.79857
NUPR1	2.88832	2.0178
GSN	2.89947	3.80917
ABCC3	2.93807	4.75423
CDC14B	2.94611	2.18805
RASAL1	3.03568	3.13214
MAOA	3.04342	2.28787
TNFRSF21	3.04781	3.15914
FAM164C	3.08781	1.71805
C3orf70	3.10261	1.91962
TP53INP1	3.14237	2.51064
PLA2G10	3.14726	2.4735
COL4A5	3.15709	2.91262
PLLP	3.16797	2.00935
CROT	3.19014	3.86752
TMEM158	3.2189	2.09726
YPEL2	3.29078	4.57865
FGD3	3.3116	1.66607
P8	3.34856	2.29433
C1orf54	3.36794	1.73519
CLCF1	3.41475	2.48784
LARP6	3.49037	2.95551
ZMAT3	3.49347	1.76783
KCNK15	3.5707	3.5997
C10orf116	3.6408	1.93969
VTCN1	3.6493	4.04102
IFI6	3.71584	2.8366
LOC100129681	3.72153	1.64695
PHLDA2	3.74007	2.38988
ARHGDIB	3.78943	2.83943
CCBP2	3.84951	5.01226
CDKN1A	3.85424	1.70457
MVP	3.85948	3.32304
S100A16	3.91791	2.20197
PLD1	3.99028	2.02633
PARP12	4.02421	1.90881
LOC644151	4.02546	6.38275
GBP2	4.14475	1.5009
KIAA0513	4.27671	3.56303
BST2	4.44123	1.6913
KRT86	4.48323	5.09167
FHL2	4.58018	3.14
LOC388743	4.62341	3.91701
PTPRE	4.66889	4.74918
C9orf169	4.94467	2.07119
IRF9	4.9615	3.50668
SERPINA3	4.99909	5.24303
RCAN1	5.34726	2.27176
C3orf52	5.36185	2.64615
PARP9	5.49429	1.57188
KRT81	5.65123	5.60499
HSPB8	5.88342	2.2367
C9orf61	6.02975	4.47394
MUC20	6.09169	3.46799
CLDN1	6.09569	9.53031
BCAS1	6.34084	2.93801
ISG15	6.42298	2.39482
MALL	6.64829	7.48541
HES2	6.66273	2.62167
MATN3	6.85844	2.79786
S100P	8.03815	2.64446
PAQR7	8.38964	4.36006
GDF15	9.78366	2.2156
ALDH1A3	10.2684	5.32184
RASD1	11.4373	2.58801
CEACAM6	13.3954	5.60094
C15orf48	14.0565	5.44886
S100A9	17.4827	2.3369
LOC645638	17.5357	6.98084
